# Supplementary material
Source: publisher figshare collection journal article supplement (https://sage.figshare.com/ndownloader/files/23101451)
Supplement: Supplementary file 1 [file 23101451]

## Supplementary Data A - Cohort Statistics

### 1 Descriptive Statistical information

During data collection, a sizable cohort of participants was observed (n=9,037), with a significant proportion (n=7,221) meeting the inclusion criteria. In total, the valid participants posted 1,245,829 times. After additional filtering, there were 1,232,741 posts, with a total of 18,990,637 words. These were broken into separate 2-week windows based on posting date, and the windows were grouped into 3 cohorts.

#### 1.1 Statistical information for the Pre Prosocial

The cohort of posts from June 1, 2018, to August 24, 2018, contained 8,523,001 total words. As detailed in Table A.1 the positive emotion markers (posemo) had a min of 4.28 with a max of 4.34. As graphed in Figure A.1 the trendline for this pre-group trended slightly upward with an R squared of 0.166

Table A.1.

*The % of linguistic marker between June 1 - August 24.*

| Start Date      | End Date        | WC      | posemo |
|-----------------|-----------------|---------|--------|
| June 1, 2018    | June 15, 2018   | 1321489 | 4.27   |
| June 15, 2018   | June 29, 2018   | 1566465 | 4.23   |
| June 29, 2018   | July 13, 2018   | 1740264 | 4.34   |
| July 13, 2018   | July 27, 2018   | 1412906 | 4.3    |
| July 27, 2018   | August 10, 2018 | 1388768 | 4.33   |
| August 10, 2018 | August 24, 2018 | 1093109 | 4.28   |

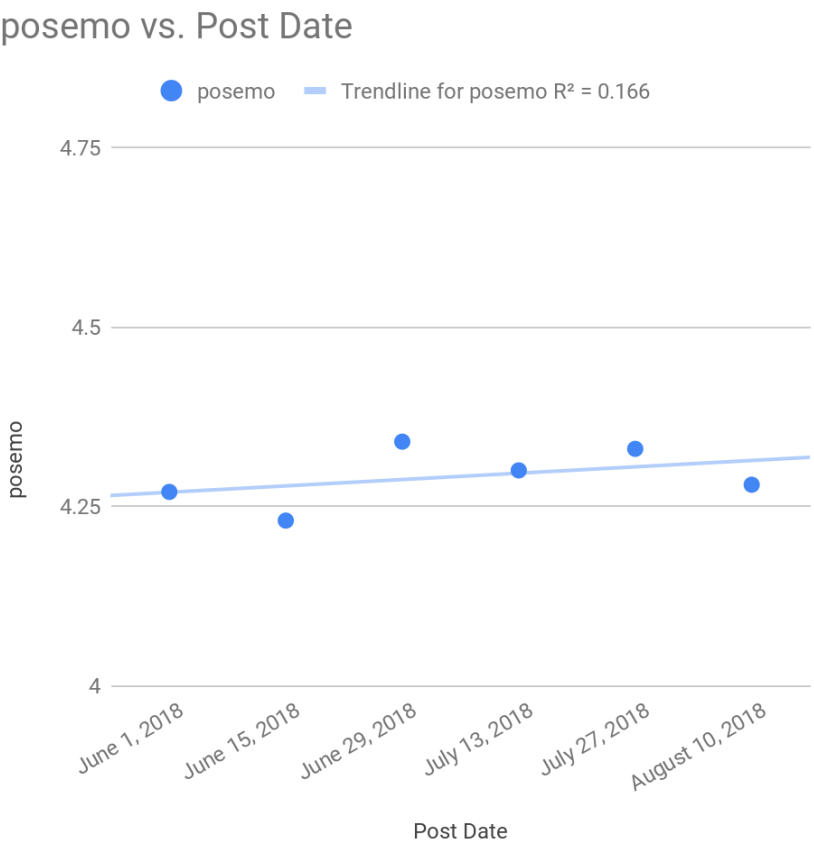

**Figure A.1;** posemo trend for Pre Prosocial Cohort  $R^2 = 0.166$

**1.2 Statistical information for the Post Prosocial**

This cohort contains all recorded posts from August 28, 2018, to December 16, 2018, with 8,029,580 total words. Table A.2 details the breakdown of linguistic marker usage during this time. For this cohort, there was an increase in the R squared of the trendline for posemo at 0.463 as detailed in Figure A.2.

Table A.2.

The % of linguistic marker between August 28 - December 16.

| Start Date         | End Date           | WC      | posemo |
|--------------------|--------------------|---------|--------|
| August 28, 2018    | September 7, 2018  | 881949  | 4.43   |
| September 7, 2018  | September 21, 2018 | 1096372 | 4.34   |
| September 21, 2018 | October 5, 2018    | 1130552 | 4.35   |
| October 5, 2018    | October 19, 2018   | 976744  | 4.45   |
| October 19, 2018   | November 2, 2018   | 1113897 | 4.46   |
| November 2, 2018   | November 16, 2018  | 1031441 | 4.34   |
| November 16, 2018  | November 30, 2018  | 798263  | 4.51   |
| November 30, 2018  | December 14, 2018  | 886446  | 4.51   |
| December 14, 2018  | December 16, 2018  | 113916  | 4.54   |

posemo vs. Post Date

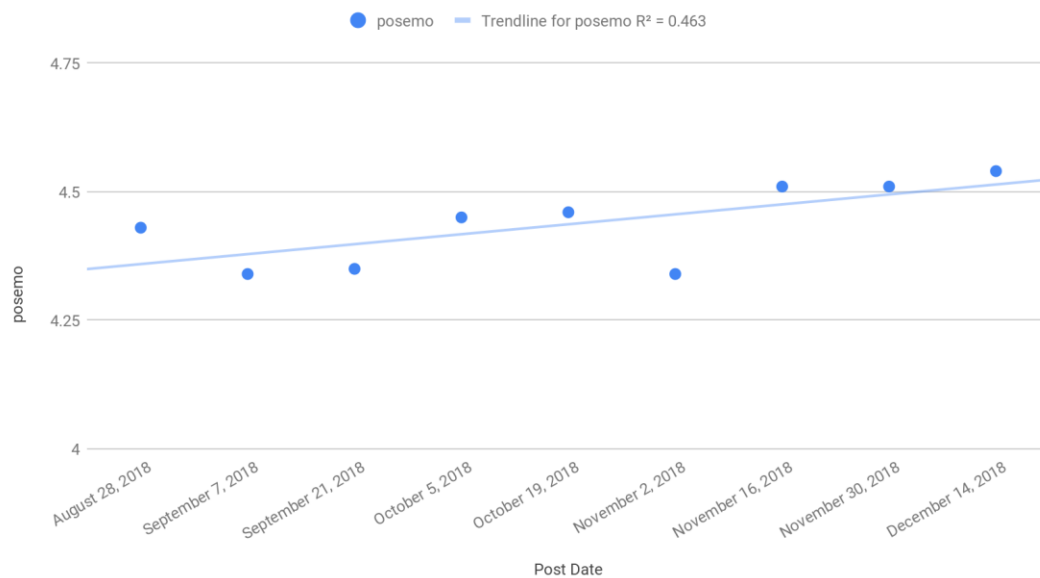

**Figure A.2;** posemo trend for Post Prosocial Cohort  $R^2 = 0.463$

### 1.3 Statistical information for the Post Reciprocity

Finally, the post reciprocity introduction cohort which spanned December 20, 2018, to February 22, 2019. This contained 2,438,056 total Words as broken down in Table A.3. The lower number of total words than other cohorts is attributable to three reasons. The first being that it was a smaller window for data gathering, slightly less than two months. The second is that due to the transient nature of users there was a lower percentage of qualifying users that had reached the word threshold. The last is that the popularity of Fortnite had peaked at this point with user numbers decreasing since August.

Table A.3.

*The % of linguistic marker between December 20 - February 22.*

| Start Date        | End Date          | WC     | posemo |
|-------------------|-------------------|--------|--------|
| December 20, 2018 | December 28, 2018 | 367715 | 4.85   |
| December 28, 2018 | January 11, 2019  | 692960 | 4.62   |
| January 11, 2019  | January 25, 2019  | 546087 | 4.43   |
| January 25, 2019  | February 8, 2019  | 453876 | 4.49   |
| February 8, 2019  | February 22, 2019 | 377418 | 4.63   |
